# Supplementary material
Source: Springer Nature journal article supplement (https://www.springermedizin.de/resource/supplementary/12936_2014_3278_MOESM14_ESM.pdf/9545484)

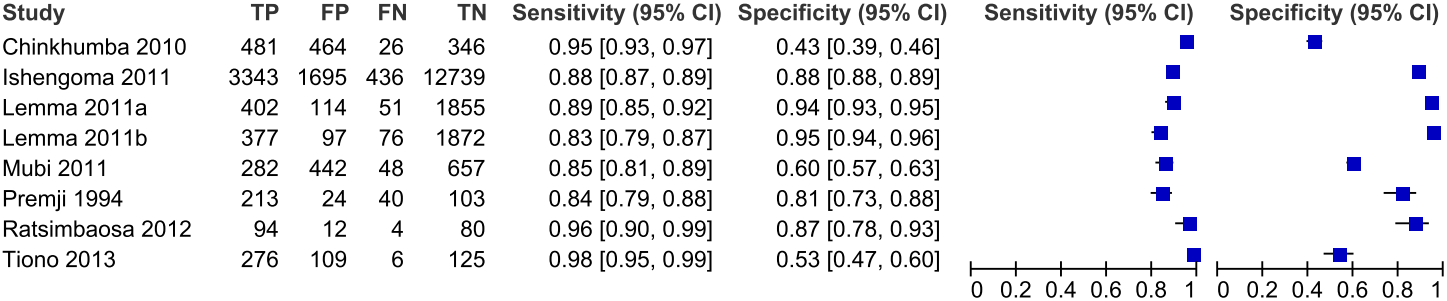

Supplement: MOESM14 [file 9545484]
